# Supplementary material
Source: publisher figshare collection journal article supplement (https://frontiersin.figshare.com/ndownloader/files/30819799)
Supplement: Supplementary file 1 [file 30819799]

**Supplementary Table S2**

One-way ANOVA for the CPUE (ind/trap/day) of the box design light trap and C.A.R.E. of the total sample in the period July-October 2018. The data were transformed with ln (x + l) to ensure homogeneity. The result is indicated as: *** P <0.001.

| F.V. | Df | SS | MSS | F | *P-value* |  |
| --- | --- | --- | --- | --- | --- | --- |
| Traps | 1 | 7.638 | 7.638 | 13.04 | **0.000676** | ******* |
| Residual | 53 | 31.031 | 0.585 |  |  |  |
